# Supplementary material
Source: publisher figshare collection journal article supplement (https://acs.figshare.com/ndownloader/files/5458097)
Supplement: Supplementary file 1 [file 5458097]

# Supporting Information

## Tunable Near-Infrared Luminescence in Tin Halide Perovskite Devices

May L. Lai<sup>1</sup>, Timothy Y. S. Tay<sup>1</sup>, Aditya Sadhanala<sup>1</sup>, Siân E. Dutton<sup>1</sup>, Guangru Li<sup>1</sup>, Richard H. Friend<sup>1\*</sup> and Zhi-Kuang Tan<sup>1,2,3\*</sup>

<sup>1</sup> Cavendish Laboratory, University of Cambridge, JJ Thomson Avenue, Cambridge, CB3 0HE, UK

<sup>2</sup> Department of Chemistry, National University of Singapore, 3 Science Drive 3, S117543, Singapore

<sup>3</sup> Solar Energy Research Institute of Singapore, National University of Singapore, 7 Engineering Drive 1, S117574, Singapore

### SUPPORTING FIGURES

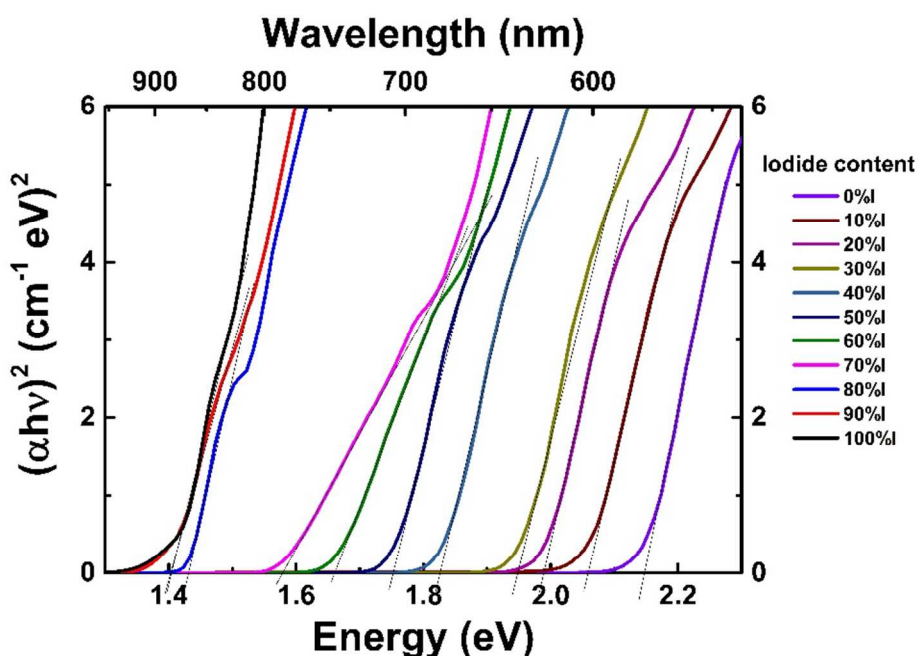

**Figure S1:** Tauc plot of normalised absorbance spectra, measured using PDS. The bandgap is read off the intersection of the interpolated absorption edge with the x-axis (grey lines).

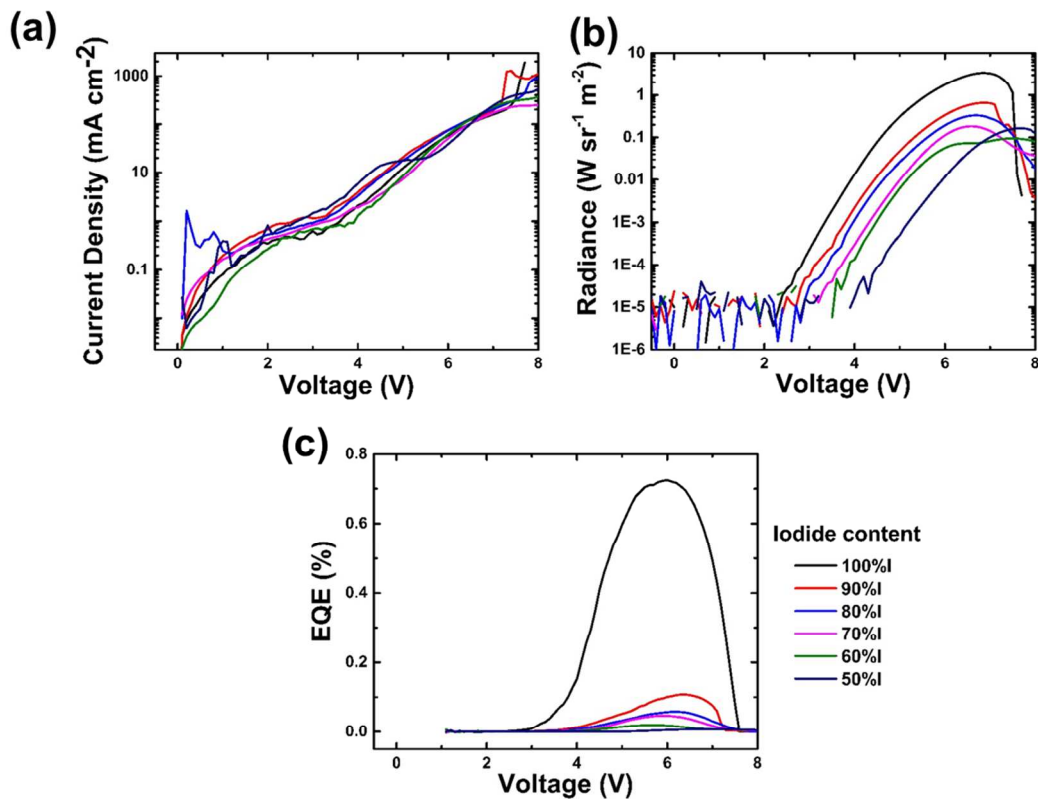

**Figure S2:** (a) Current density vs. voltage plots, (b) radiance vs. voltage plots, and (c) EQE vs. voltage plots of tin perovskite PeLEDs with different halide compositions (50-100% iodide).

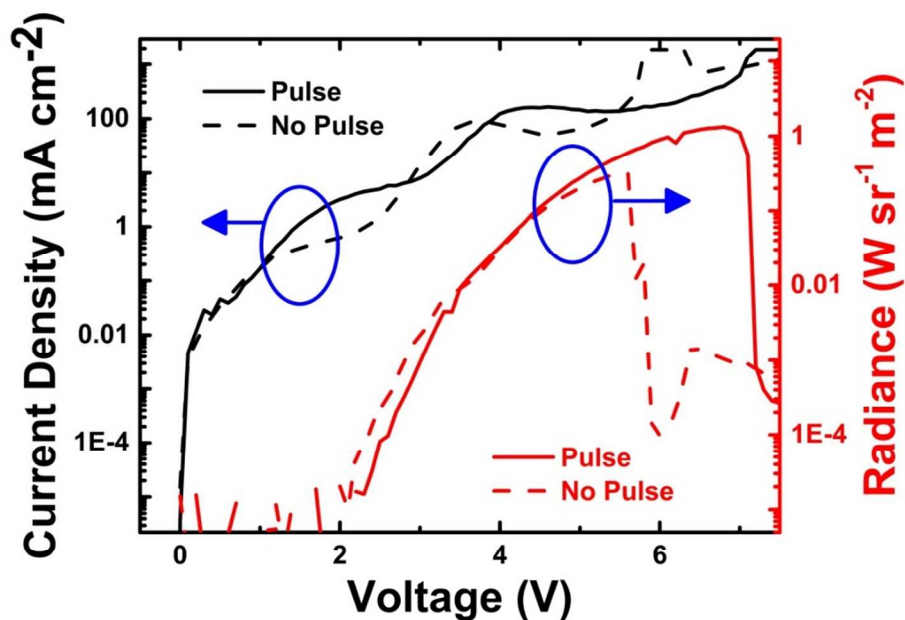

**Figure S3:** Figure shows the combined current density vs voltage and radiance vs voltage plots of 2 device pixels on the same device. One pixel is driven in stepped voltages with 3000 ms step width (dashed lines), and the other pixel is driven in voltage pulses ( $\sim 750$  ms pulse), followed by  $\sim 2250$  ms

off time (solid lines). The pulsing method allows the device pixel to cool between the pulses during the off state. This pulsing allows the device pixel to survive to a higher driving voltage and current density, compared to the non-pulsed device, hence showing that heating effects contribute to device degradation.

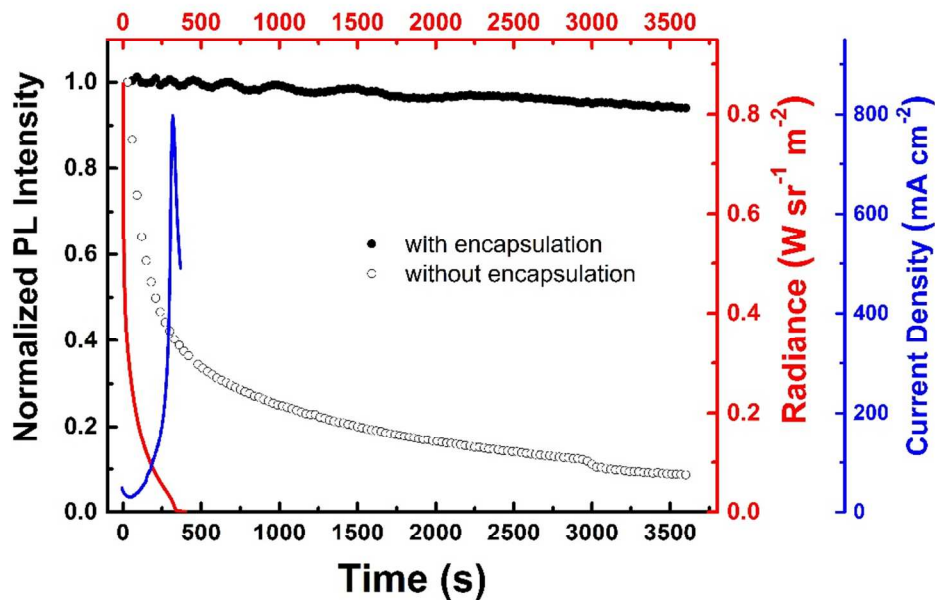

**Figure S4.** A 100% iodide PeLED (encapsulated with UV-cured epoxy glue and glass) was operated at a fixed voltage of 6V, and its radiance (red) and current density (blue) were plotted over time. The device radiance degraded rapidly and burned out within 6 minutes. This is accompanied by a massive increase in current density. The normalized PL intensity of a 100% iodide perovskite film, under a 100mW 532nm laser excitation, was plotted in the same graph for comparison (filled black spheres represent film which is encapsulated with a layer of PMMA and measured under nitrogen flow; unfilled black spheres represent non-encapsulated film which is measured in air). The encapsulated film showed a stable output over 1 hour while the non-encapsulated film degrades rapidly.

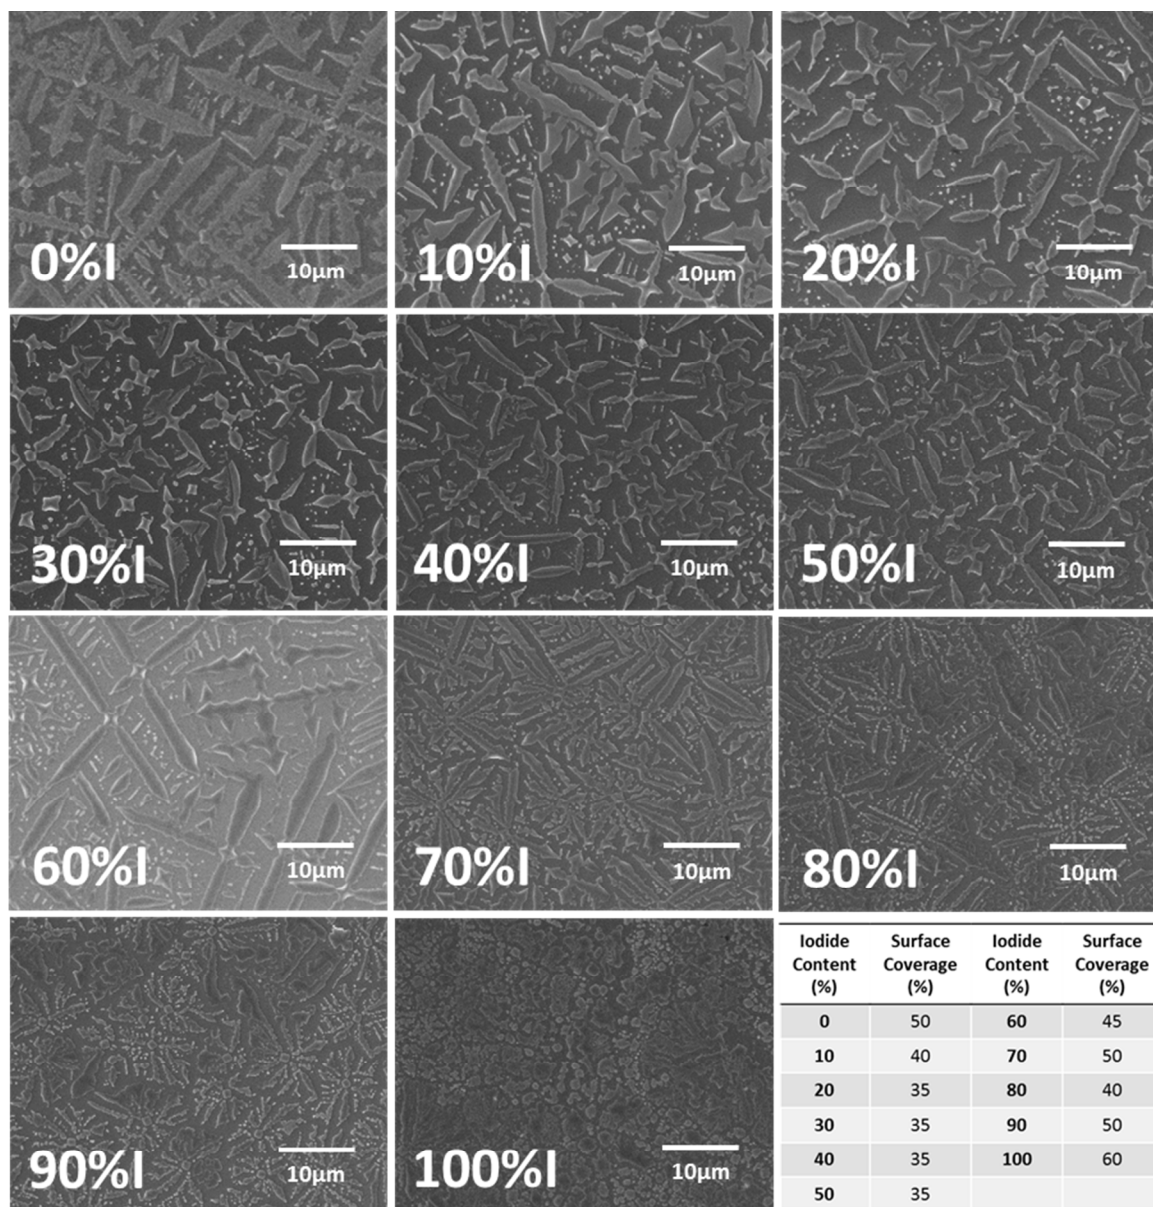

**Figure S5:** SEM images of perovskite thin films with different halide compositions (0 – 100% iodide content). Table shows a summary of the percentage film coverage, as estimated from the SEM images. From these images, we estimate the surface coverage to be in the range of 35% to 50% for the bromide containing samples, but higher at 60% for the pure triiodide sample. Hence, even though the PL of the 100% iodide sample is only 3 times higher than the 90% sample, the EL of the 100% sample is a factor of 7 higher due to better surface coverage. A better film coverage ensures that more charges are injected into the perovskite, rather than leaked across the pinholes, thereby giving a higher EL efficiency.
